# Supplementary material for: Occurrence, removal efficiency and exposure assessment of bisphenols in drinking water treatment plants
Source: Royal Society of Chemistry journal article supplement (doi:10.1039/d2ew00797e), 2022-12-19
Supplement: d2ew00797e1.pdf [file d2ew00797e1.pdf]

Table S1 Treatment processes of the sampling DWTPs in Taihu Lake Basin

| Name of DWTP | Processes of DWTP                                                                                                   | Daily water supply capacity (kt/d) |
|--------------|---------------------------------------------------------------------------------------------------------------------|------------------------------------|
| XD           | Influent—Pre-ozone—Biological contact oxidation—<br>Sedimentation—Sand filter—Post-ozone—Carbon filter—<br>Effluent | 600                                |
| NQ           | Influent—Pre-ozone—Biological contact oxidation—Effluent                                                            | 200                                |
| ZQ           | Influent—Sedimentation—Sand filter—Post-ozone—Carbon<br>filter—Effluent                                             | 600                                |
| XC           | Influent—Sand filter—Post-ozone—Carbon filter—Effluent                                                              | 1000                               |
| JB           | Influent—Pre-ozone—Sedimentation—Sand filter—Carbon<br>filter—Effluent                                              | 300                                |
| TH           | Influent—Pre-ozone—Flocculation—Sedimentation—Sand<br>filter—Post-ozone—Carbon filter—Effluent                      | 200                                |
| TS           | Influent—Sedimentation—Sand filter—Post-ozone—Carbon<br>filter—Effluent                                             | 300                                |
| SX           | Influent—Pre-ozone—Flocculation—Sedimentation—Sand<br>filter—Post-ozone—Carbon filter—Effluent                      | 500                                |
| JX           | Influent—Sedimentation biological filter—Sand filter—Post-<br>sand filter— Post-ozone—Carbon filter—Effluent        | 500                                |

Table S2 Single reaction monitoring information of 12 BPs targets

| Compounds                          | Molecular                                                     | Molecular mass | Parent and product ion (m/Z) | Collision energy(eV) |
|------------------------------------|---------------------------------------------------------------|----------------|------------------------------|----------------------|
| BPA                                | C <sub>15</sub> H <sub>16</sub> O <sub>2</sub>                | 228.29         | 226.981>211.986*<br>>133.096 | 21.53                |
| BPS                                | C <sub>12</sub> H <sub>10</sub> O <sub>4</sub> S              | 250.27         | 248.97>108.111*<br>>92.157   | 31.64                |
| BPF                                | C <sub>13</sub> H <sub>12</sub> O <sub>2</sub>                | 200.23         | 199.122>93.111*<br>>105.1    | 25.32                |
| BPB                                | C <sub>16</sub> H <sub>18</sub> O <sub>2</sub>                | 242.31         | 241.152>212*<br>>210.7       | 21.28                |
| BPE                                | C <sub>14</sub> H <sub>14</sub> O <sub>2</sub>                | 214.26         | 213.122>198*<br>>119.222     | 19.86                |
| BPP                                | C <sub>24</sub> H <sub>26</sub> O <sub>2</sub>                | 346.46         | 345.183>330.04*<br>>315.001  | 29.52                |
| BPZ                                | C <sub>18</sub> H <sub>20</sub> O <sub>2</sub>                | 268.35         | 267.152>173.04*<br>>223.009  | 30.43                |
| BPAF                               | C <sub>15</sub> H <sub>10</sub> F <sub>6</sub> O <sub>2</sub> | 336.23         | 335>264.929*<br>>196.906     | 26.79                |
| BPAP                               | C <sub>20</sub> H <sub>18</sub> O <sub>2</sub>                | 290.36         | 289.091>274*<br>>211.0       | 23.25                |
| <sup>13</sup> C <sub>12</sub> -BPA | C <sub>15</sub> H <sub>16</sub> O <sub>2</sub>                | 240.20         | 239.2>224*<br>>139.155       | 21.53                |
| <sup>13</sup> C <sub>12</sub> -BPF | C <sub>13</sub> H <sub>12</sub> O <sub>2</sub>                | 212.15         | 211.122>99.111*<br>>178      | 25.88                |
| <sup>13</sup> C <sub>12</sub> -BPS | C <sub>12</sub> H <sub>10</sub> O <sub>4</sub> S              | 262.18         | 261>114.111*<br>>245         | 32.85                |

\* : Product ions for quantification

Table S3 LODs and LOQs of target BPs

| Compounds                          | Limit of detection<br>(LOD) (ng/L) | Limit of quantification<br>(LOQ) (ng/L) |
|------------------------------------|------------------------------------|-----------------------------------------|
| BPA                                | 0.0180                             | 0.0600                                  |
| BPS                                | 0.0300                             | 0.100                                   |
| BPF                                | 0.0900                             | 0.300                                   |
| BPB                                | 0.0750                             | 0.250                                   |
| BPE                                | 0.0900                             | 0.300                                   |
| BPP                                | 0.0360                             | 0.120                                   |
| BPZ                                | 0.0900                             | 0.300                                   |
| BPAF                               | 0.0600                             | 0.200                                   |
| BPAP                               | 0.0540                             | 0.180                                   |
| <sup>13</sup> C <sub>12</sub> -BPF | 0.0300                             | 0.100                                   |
| <sup>13</sup> C <sub>12</sub> -BPS | 0.0300                             | 0.100                                   |

Table S4 Exposure factors for different populations(1, 2)

| Type of people (age: a)    | BW (kg) | IR (L/day) |
|----------------------------|---------|------------|
| Adult Male ( $\geq 18$ )   | 65.0    | 2.000      |
| Adult Female ( $\geq 18$ ) | 56.8    | 1.71       |
| Boy (12-15)                | 48.7    | 1.41       |
| Girl (12-15)               | 45.7    | 1.35       |
| Boy (6-9)                  | 27.3    | 1.21       |
| Girl (6-9)                 | 25.5    | 1.16       |
| Boy (3-4)                  | 15.8    | 0.863      |
| Girl (3-4)                 | 15.3    | 0.863      |

Table S5 EEf values of BPs from different studies

| Target<br>compounds | EEF value ( $E_2$ ) |     |                    |     |                    |     |
|---------------------|---------------------|-----|--------------------|-----|--------------------|-----|
|                     | reference           |     | reference          |     | reference          |     |
| BPA                 | 1.93E <sup>-3</sup> | (3) | 1E <sup>-4</sup>   | (4) | 8E <sup>-5</sup>   | (5) |
| BPS                 | 5.5E <sup>-5</sup>  | (3) |                    |     | 9E <sup>-6</sup>   | (5) |
| BPF                 | 7.19E <sup>-4</sup> | (3) | 6.7E <sup>-6</sup> | (4) | 9E <sup>-6</sup>   | (5) |
| BPB                 | 5.93E <sup>-3</sup> | (3) | 1E <sup>-4</sup>   | (4) | 8.6E <sup>-4</sup> | (5) |
| BPE                 | 7.15E <sup>-4</sup> | (3) |                    |     |                    |     |
| BPP                 | 1.18E <sup>-3</sup> | (3) |                    |     |                    |     |
| BPZ                 | 2.12E <sup>-3</sup> | (3) |                    |     |                    |     |
| BPAF                | 7.74E <sup>-3</sup> | (3) |                    |     |                    |     |
| BPAP                | 8.03E <sup>-4</sup> | (3) |                    |     |                    |     |

Table S6 BPs in raw water of waterworks from the Taihu Lake Basin in August 2019 and December 2019 (unit: ng/L)

| Target compounds | Detection frequency (%) | August  |         |       |        | Detection frequency (%) | December |         |       |        |
|------------------|-------------------------|---------|---------|-------|--------|-------------------------|----------|---------|-------|--------|
|                  |                         | maximum | minimum | mean  | medium |                         | maximum  | minimum | mean  | medium |
| BPS              | 89                      | 1.19    | < LOQ   | 0.450 | 0.270  | 100                     | 2.05     | 0.0763  | 0.763 | 0.729  |
| BPAF             | 89                      | 0.670   | < LOQ   | 0.390 | 0.430  | 100                     | 0.182    | 0.0842  | 0.130 | 0.125  |
| BPF              | 100                     | 12.5    | 2.59    | 8.44  | 8.22   | 100                     | 14.0     | 0.290   | 2.68  | 1.14   |
| BPE              | 100                     | 8.81    | 3.49    | 6.18  | 6.36   | 100                     | 4.73     | 1.60    | 2.35  | 1.99   |
| BPA              | 100                     | 27.8    | 8.60    | 19.7  | 20.4   | 100                     | 10.7     | 2.44    | 6.44  | 7.56   |
| BPB              | 100                     | 3.78    | 1.01    | 2.33  | 2.56   | 100                     | 1.62     | 0.317   | 0.831 | 0.747  |
| BPAP             | 100                     | 4.84    | 2.62    | 3.38  | 3.36   | 100                     | 3.28     | 0.990   | 1.92  | 1.76   |
| BPZ              | 100                     | 10.2    | 2.14    | 4.82  | 3.75   | 100                     | 4.28     | 1.25    | 2.50  | 1.93   |
| BPP              | 100                     | 4.93    | 0.260   | 2.38  | 2.78   | 100                     | 1.96     | 0.570   | 1.00  | 0.731  |
| ∑BPs             |                         | 66.8    | 29.0    | 48.1  | 49.0   |                         | 40.4     | 10.5    | 18.6  | 16.4   |

< LOQ: below limit of quantitation.

Table S7 BPs in finished water of waterworks from the Taihu Lake Basin in August 2019 and December 2019 (unit: ng/L)

| Target compounds | Detection frequency (%) | August  |         |        |        | Detection frequency (%) | December |         |        |        |
|------------------|-------------------------|---------|---------|--------|--------|-------------------------|----------|---------|--------|--------|
|                  |                         | maximum | minimum | mean   | median |                         | maximum  | minimum | mean   | median |
| BPS              | 56                      | 0.163   | <LOQ    | 0.0406 | 0.039  | 67                      | 0.173    | <LOQ    | 0.0498 | 0.0665 |
| BPAF             | 44                      | 0.338   | <LOQ    | 0.102  | 0.195  | 0                       | <LOQ     | <LOQ    | <LOQ   | <LOQ   |
| BPF              | 100                     | 6.08    | 1.90    | 4.57   | 5.00   | 100                     | 0.494    | 0.176   | 0.254  | 0.205  |
| BPE              | 100                     | 5.97    | 0.612   | 3.42   | 3.28   | 100                     | 2.91     | 0.790   | 1.44   | 1.18   |
| BPA              | 100                     | 16.28   | 1.68    | 8.65   | 8.95   | 78                      | 5.57     | <LOQ    | 1.75   | 1.49   |
| BPB              | 78                      | 1.916   | <LOQ    | 0.713  | 1.00   | 100                     | 0.757    | 0.114   | 0.380  | 0.404  |
| BPAP             | 100                     | 3.13    | 1.91    | 2.43   | 2.43   | 100                     | 2.95     | 0.464   | 1.45   | 1.39   |
| BPZ              | 100                     | 3.62    | 0.521   | 2.06   | 1.77   | 100                     | 3.18     | 0.679   | 1.65   | 1.46   |
| BPP              | 100                     | 2.98    | 0.137   | 0.914  | 0.539  | 100                     | 0.954    | 0.204   | 0.485  | 0.410  |
| $\Sigma$ BPs     |                         | 39.9    | 10.6    | 22.9   | 21.6   |                         | 16.3     | 3.07    | 7.46   | 6.21   |

< LOQ: below limit of quantitation.

Table S8 mean and median removal efficiency by different water treatment processes for two seasons in 2019

| water treatment processes             | BPS                         |        | BPAF                  |        | BPF                        |         | BPE                       |        | BPA                       |        | BPB                        |        | BPAP                       |        | BPZ                        |        | BPP                        |        |
|---------------------------------------|-----------------------------|--------|-----------------------|--------|----------------------------|---------|---------------------------|--------|---------------------------|--------|----------------------------|--------|----------------------------|--------|----------------------------|--------|----------------------------|--------|
|                                       | mean                        | median | mean                  | median | mean                       | median  | mean                      | median | mean                      | median | mean                       | median | mean                       | median | mean                       | median | mean                       | median |
| Sedimentation<br>(N=12)               | -<br>25.33%<br>±164.67<br>% | 0.57%  | -<br>1.79%±<br>41.39% | 0.00%  | 18.82%<br>±72.53<br>%      | 25.26%  | 1.16%<br>±15.57<br>%      | 4.61%  | 17.29%<br>±30.28<br>%     | 11.49% | 21.60%<br>±31.41<br>%      | 16.38% | 8.19%±<br>25.23%           | 12.89% | 10.93%<br>±26.22<br>%      | 6.42%  | -<br>0.84%±<br>30.84%      | 0.37%  |
| Sand filtration<br>(N=16)             | 3.75%±<br>94.49%            | 0.00%  | 4.77%±<br>17.23%      | 0.00%  | 22.02%<br>±35.53<br>%      | 27.64%  | -<br>0.50%<br>±21.87<br>% | 1.02%  | 12.73%<br>±28.05<br>%     | 16.78% | -<br>7.88%±<br>41.97%      | 3.45%  | -<br>2.94%±<br>22.33%      | 0.75%  | -<br>8.63%±<br>45.22%      | -1.12% | 8.24%±<br>38.99%           | 0.69%  |
| Carbon filtration<br>(N=15)           | 24.64%<br>±42.13<br>%       | 0.00%  | 36.11%<br>±40.75<br>% | 20.55% | 36.39%<br>±33.49<br>%      | 44.93%  | 31.10%<br>±22.30<br>%     | 26.71% | 39.08%<br>±24.72<br>%     | 37.26% | 39.75%<br>±22.25<br>%      | 46.05% | 15.88%<br>±20.82<br>%      | 15.96% | 16.20%<br>±45.71<br>%      | 19.50% | 15.84%<br>±49.17<br>%      | 22.93% |
| Pre-ozone<br>(N=7)                    | 27.12%<br>±76.85<br>%       | 53.77% | 32.97%<br>±46.05<br>% | 16.69% | 46.20%<br>±40.63<br>%      | 52.03%  | 6.68%<br>±18.45<br>%      | 6.79%  | 18.75%<br>±19.35<br>%     | 22.31% | 6.15%±<br>54.89%           | 14.96% | -<br>10.42%<br>±44.65<br>% | 0.38%  | -<br>19.62%<br>±44.14<br>% | -2.92% | 23.87%<br>±21.53<br>%      | 21.71% |
| Biological contact oxidation<br>(N=4) | 30.17%<br>±50.92<br>%       | 31.84% | 11.85%<br>±15.17<br>% | 5.16%  | 1.17%±<br>1.77%            | 0.23%   | 7.12%<br>±4.94<br>%       | 5.81%  | 6.06%<br>±14.70<br>%      | 7.41%  | -<br>18.17%<br>±28.84<br>% | -9.31% | -<br>11.07%<br>±17.22<br>% | -8.49% | -<br>5.93%±<br>5.83%       | -6.77% | -<br>14.88%<br>±49.19<br>% | 11.08% |
| Post-ozone<br>(N=13)                  | 20.10%<br>±84.15<br>%       | 47.07% | 7.09%±<br>20.79%      | 0.00%  | -<br>32.67%<br>±81.53<br>% | -6.33%  | 6.20%<br>±15.53<br>%      | 9.58%  | -<br>0.13%<br>±25.77<br>% | 2.04%  | -<br>13.26%<br>±77.15<br>% | 19.15% | -<br>5.55%±<br>34.56%      | 0.81%  | -<br>1.98%±<br>36.07%      | 4.85%  | -<br>14.66%<br>±59.48<br>% | -1.72% |
| Flocculation<br>(N=4)                 | -<br>3.68%±<br>48.12%       | 13.73% | 14.72%<br>±55.74<br>% | 7.53%  | -<br>40.66%<br>±38.53<br>% | -39.79% | 3.13%<br>±15.32<br>%      | 8.53%  | -<br>2.34%<br>±4.88<br>%  | -2.87% | -<br>11.17%<br>±13.22<br>% | -7.32% | 6.54%±<br>8.30%            | 6.61%  | 12.52%<br>±40.51<br>%      | -1.87% | 19.51%<br>±31.42<br>%      | 4.57%  |



|                                                |                       |        |                            |        |                            |       |                      |       |                           |        |                       |       |                  |       |                       |       |                       |       |
|------------------------------------------------|-----------------------|--------|----------------------------|--------|----------------------------|-------|----------------------|-------|---------------------------|--------|-----------------------|-------|------------------|-------|-----------------------|-------|-----------------------|-------|
| Chlorination<br>(N=18)                         | 28.80%<br>±36.19<br>% | 21.49% | 26.68%<br>±39.44<br>%      | 11.50% | -<br>11.48%<br>±39.22<br>% | 0.00% | 0.80%<br>±34.50<br>% | 0.34% | 10.98%<br>±47.76<br>%     | 11.28% | 22.05%<br>±38.49<br>% | 6.43% | 4.48%±<br>24.13% | 3.89% | 14.43%<br>±20.39<br>% | 9.82% | 0.62%±<br>50.85%      | 8.82% |
| Sedimentation<br>biological<br>filter<br>(N=2) | -<br>2.19%±<br>2.19%  | -      | -<br>16.97%<br>±15.54<br>% | -      | 3.92%±<br>12.20%           | -     | 9.91%<br>±7.00<br>%  | -     | -<br>6.63%<br>±25.82<br>% | -      | 10.57%<br>±33.17<br>% | -     | 11.37%<br>±3.60% | -     | 15.56%<br>±4.51%      | -     | 41.38%<br>±44.48<br>% | -     |

---

Figure S1 EEQs of BPs in finished water from the Taihu Lake Basin

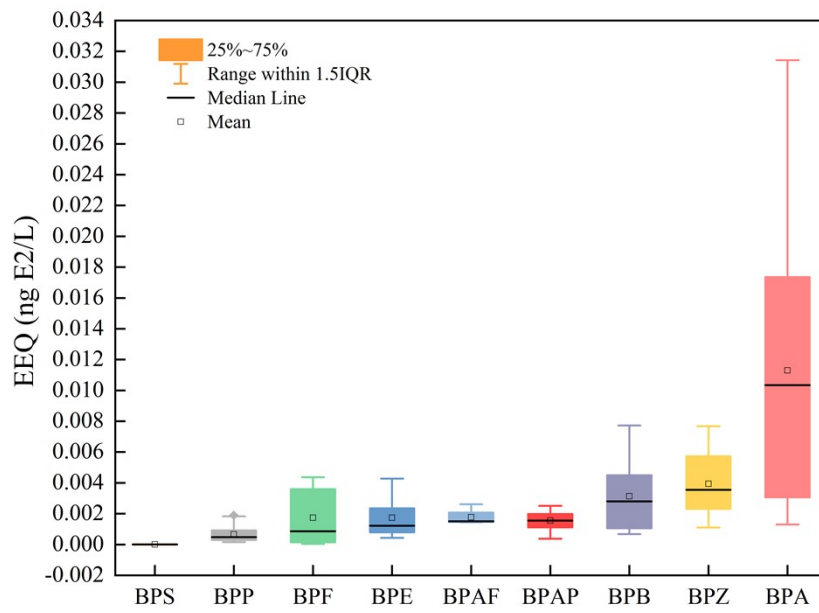

## Reference:

1. MEPC. Ministry of Environmental Protection of the P.R.C. Exposure factors handbook of Chinese population (for children)[M]. China Environmental Science Press, Beijing (In Chinese), 2016.
2. MEPC. Ministry of Environmental Protection of the P.R.C. Exposure factors handbook of Chinese population (for adults)[M]. China Environmental Science Press, Beijing (In Chinese), 2016. .
3. NITE. <http://www.safe.nite.go.jp/english/index.html>. 2018 [EB/OL].
4. Nishihara T. Estrogenic activities of 517 chemical by yeast two-hybrid assay (vol 46, pg 284, 2000). Journal of Health Science. 2001;47(3):330-.
5. Blair RM, Fang H, Branham WS, Hass BS, Dial SL, Moland CL, et al. The estrogen receptor relative binding affinities of 188 natural and xenochemicals: Structural diversity of ligands. Toxicological Sciences. 2000;54(1):138-53.
